# Supplementary material for: Titania nanomaterials: efficient and recyclable heterogeneous catalysts for the solvent-free synthesis of poly-substituted quinolines via Friedlander hetero-annulation
Source: Royal Society of Chemistry journal article supplement (doi:10.1039/c3ra46128a), 2014-01-01

## Supplementary Information

### **Titania nanomaterials: efficient and recyclable heterogeneous catalysts for the solvent-free synthesis of poly-substituted quinolines via Friedlander hetero-annulation**

**Prabal Bandyopadhyay,<sup>a,b</sup> G.K. Prasad,<sup>a</sup> Manisha Sathe,<sup>a</sup> Pratibha Sharma,<sup>\*b</sup>  
Ashok Kumar<sup>b</sup> and M.P. Kaushik<sup>\*a</sup>**

<sup>a</sup>*Defence Research & Development Establishment, Jhansi Road, Gwalior 474 002 (M.P.), India*

<sup>b</sup>*School of Chemical Sciences, Devi Ahilya University, Khandwa Road, Indore 452 001 (M.P.), India*

<sup>\*a</sup> E-mail: [mpkaushik@rediffmail.com](mailto:mpkaushik@rediffmail.com), Tel.: +91-751- 2343972; Tel: +91-751- 2340042

<sup>\*b</sup> E-mail: [drpratibhasharma@yahoo.com](mailto:drpratibhasharma@yahoo.com), Tel.: +91-731-2460208; Fax: +91-731-2470352

### **Contents:**

|                                                               |                |
|---------------------------------------------------------------|----------------|
| <b>General Experimental Information</b>                       | <b>S2</b>      |
| <b>Characterization of compounds</b>                          | <b>S2-S7</b>   |
| <b>Copies of representative ESI-MS spectra</b>                | <b>S8-S10</b>  |
| <b>Copies of GC-MS spectra (Reaction progress monitoring)</b> | <b>S11-S13</b> |

**General Experimental Information:** All chemicals were purchased from Sigma-Aldrich, India and used without further purification. Solvents were distilled prior to use. Triple distilled water was used for the reaction. The reactions were performed in air atmosphere without any specific precautions. Reactions were carried out on controlled temperature oil bath in conventional heating method. Melting points were determined with open capillary tube on a Gallenkamp (variable heater) melting point apparatus and were uncorrected. FT-IR spectra were recorded as KBr pellets on a Bruker Tensor 27 spectrometer with Opus 5.5 software. The  $^1\text{H}$  and  $^{13}\text{C}$  NMR spectra of the synthesized compounds were recorded at 400 MHz and 100 MHz respectively using Bruker AVANCE 400 MHz NMR spectrometer in  $\text{DMSO-d}_6$  and  $\text{CDCl}_3$  solvent and the chemical shifts ( $\delta$ ) were expressed in ppm relative to TMS as internal standard and coupling constants ( $J$ ) in Hz. Spin multiplicities are described as s (singlet), d (doublet), t (triplet), q (quartet) and m (multiplet). Mass analysis was performed on quadruple-time of flight (Q-Tof) mass spectrometer (Micromass, USA) using electrospray ionization (ESI) in positive mode. TLC is performed using precoated aluminium sheets with silica gel 60 F<sub>254</sub>. GC-MS system (5975C) of Agilent, USA make was used for characterization of reaction products.

**All the synthesized poly-substituted quinoline derivatives are fully characterized by four independent characterization techniques (Melting point, FT-IR,  $^1\text{H}$ -NMR,  $^{13}\text{C}$  NMR and ESI-MS) as follows:**

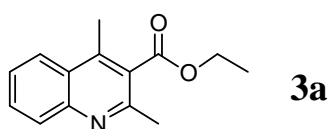

**Ethyl 2,4-dimethylquinoline-3-carboxylate (3a)<sup>1</sup>**

Viscous oil; Yield: 0.211 g, 92%;  $^1\text{H}$  NMR (400 MHz,  $\text{CDCl}_3$ ):  $\delta$  (ppm) 1.44 (t,  $J = 7.1$  Hz, 3H,  $\text{CH}_3$ ), 2.66 (s, 3H,  $\text{CH}_3$ ), 2.71 (s, 3H,  $\text{CH}_3$ ), 4.49 (q,  $J = 7.1$  Hz, 2H,  $\text{OCH}_2$ ), 7.54-7.56 (m, 1H, Ar-H), 7.69-7.71 (m, 1H, Ar-H), 7.98-8.02 (m, 2H, Ar-H).  $^{13}\text{C}$  NMR (100 MHz,  $\text{CDCl}_3$ ):  $\delta$  (ppm) 14.1, 15.5, 23.6, 61.2, 123.6, 125.7, 126.1, 127.8, 129.7, 141.1, 147.2, 154.2, 168.9. ESI-MS:  $m/z$  230  $[\text{M}+\text{H}]^+$ ; Anal. Calcd. for  $\text{C}_{14}\text{H}_{15}\text{NO}_2$ : C, 73.34; H, 6.59; N, 6.11%; Found: C, 73.24; H, 6.66; N, 5.99%.

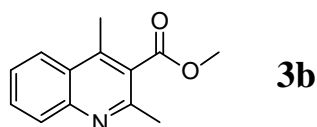

**Methyl 2,4-dimethylquinoline-3-carboxylate (3b)**

Viscous oil; Yield: 0.202 g, 94%;  $^1\text{H}$  NMR (400 MHz,  $\text{CDCl}_3$ ):  $\delta$  (ppm) 2.65 (s, 3H,  $\text{CH}_3$ ), 2.71 (s, 3H,  $\text{CH}_3$ ), 3.82 (s, 3H,  $\text{OCH}_3$ ), 7.53-7.55 (m, 1H, Ar-H), 7.71-7.73 (m, 1H, Ar-H), 7.99-8.03 (m, 2H, Ar-H).  $^{13}\text{C}$  NMR (100 MHz,  $\text{CDCl}_3$ ):  $\delta$  (ppm) 15.8, 23.9, 52.5, 123.6, 125.8, 126.2, 127.7, 128.8, 129.6, 141.3, 147.0, 154.4, 168.5. ESI-MS:  $m/z$  216  $[\text{M}+\text{H}]^+$ . Anal. Calcd. for  $\text{C}_{13}\text{H}_{13}\text{NO}_2$ : C, 72.54; H, 6.09; N, 6.51%; Found: C, 72.66; H, 6.12; N, 6.43%.

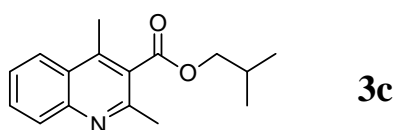

**Isobutyl 2,4-dimethylquinoline-3-carboxylate (3c)**

Viscous oil; Yield: 0.224 g, 87%;  $^1\text{H}$  NMR (400 MHz,  $\text{CDCl}_3$ ):  $\delta$  (ppm) 1.03 (d,  $J = 5.6$  Hz, 6H,  $\text{CH}_3$ ), 2.07 (m, 1H, CH), 2.68 (s, 3H,  $\text{CH}_3$ ), 2.74 (s, 3H,  $\text{CH}_3$ ), 4.08 (d,  $J = 6.8$  Hz, 2H,  $\text{CH}_2$ ), 7.55-7.57 (m, 1H, Ar-H), 7.70-7.72 (m, 1H, Ar-H), 8.02-8.04 (m, 1H, Ar-H), 8.05-8.07 (m, 1H, Ar-H).  $^{13}\text{C}$  NMR (100 MHz,  $\text{CDCl}_3$ ):  $\delta$  (ppm) 16.9, 22.5, 27.3, 72.6, 125.6, 126.3, 127.9, 128.5, 129.4, 141.3, 147.0, 154.6, 166.8. ESI-MS:  $m/z$  258  $[\text{M}+\text{H}]^+$ . Anal. Calcd. for  $\text{C}_{16}\text{H}_{19}\text{NO}_2$ : C, 74.68; H, 7.44; N, 5.44%; Found: C, 74.61; H, 7.52; N, 5.39%.

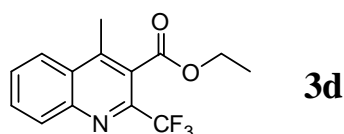

**Ethyl 4-methyl-2-(trifluoromethyl)quinoline-3-carboxylate (3d)**

Viscous oil; Yield: 0.235 g, 83%;  $^1\text{H}$  NMR (400 MHz,  $\text{CDCl}_3$ ):  $\delta$  (ppm) 1.36 (t,  $J = 7.2$  Hz, 3H,  $\text{CH}_3$ ), 2.63 (s, 3H,  $\text{CH}_3$ ), 4.45 (q,  $J = 7.2$  Hz, 2H,  $\text{CH}_2$ ), 7.57-7.59 (m, 1H, Ar-H), 7.75-7.77 (m, 1H, Ar-H), 8.08-8.12 (m, 2H, Ar-H).  $^{13}\text{C}$  NMR (100 MHz,  $\text{CDCl}_3$ ):  $\delta$  (ppm) 14.2, 15.7, 61.1, 119.6, 127.1, 128.5, 129.8, 130.7, 135.1, 141.1, 147.2, 149.8, 169.0. ESI-MS:  $m/z$  284  $[\text{M}+\text{H}]^+$ . Anal. Calcd. for  $\text{C}_{14}\text{H}_{12}\text{F}_3\text{NO}_2$ : C, 59.37; H, 4.27; N, 4.95%; Found: C, 59.46; H, 4.17; N, 5.03%.

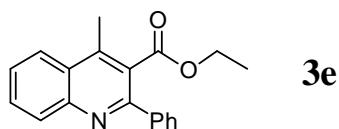

**Ethyl 4-methyl-2-phenylquinoline-3-carboxylate (3e)**

Solid; Yield: 0.236 g, 81%; m.p 97-98 °C; <sup>1</sup>H NMR (400 MHz, CDCl<sub>3</sub>): δ (ppm) 1.47 (t, *J* = 7.2 Hz, 3H, CH<sub>3</sub>), 2.71 (s, 3H, CH<sub>3</sub>), 4.51 (q, *J* = 7.2 Hz, 2H, OCH<sub>2</sub>), 6.77-6.79 (m, 1H, Ar-H), 7.56-7.60 (m, 2H, Ar-H), 7.70-7.72 (m, 1H, Ar-H), 7.96-7.98 (m, 1H, Ar-H), 7.99-8.03 (m, 2H, Ar-H), 8.05-8.07 (m, 2H, Ar-H). <sup>13</sup>C NMR (100 MHz, CDCl<sub>3</sub>): δ (ppm) 14.4, 15.3, 61.2, 123.9, 126.7, 127.8, 128.5, 129.8, 130.4, 131.7, 135.3, 141.1, 148.5, 151.2, 168.9. ESI-MS: *m/z* 292 [M+H]<sup>+</sup>. Anal. Calcd. for C<sub>19</sub>H<sub>17</sub>NO<sub>2</sub>: C, 78.33; H, 5.88; N, 4.81%; Found: C, 78.24; H, 5.71; N, 4.94%.

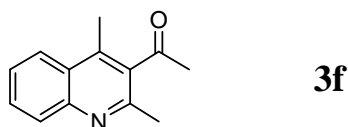

**1-(2,4-Dimethylquinolin-3-yl)ethanone (3f)<sup>1</sup>**

Viscous oil; Yield: 0.177 g, 89%; <sup>1</sup>H NMR (400 MHz, CDCl<sub>3</sub>): δ (ppm) 2.54 (s, 3H, CH<sub>3</sub>), 2.58 (s, 3H, CH<sub>3</sub>), 2.62 (s, 3H, COCH<sub>3</sub>), 7.49-7.51 (m, 1H, Ar-H), 7.64-7.66 (m, 1H, Ar-H), 7.93-7.95 (m, 1H, Ar-H), 7.99-8.01 (m, 1H, Ar-H). <sup>13</sup>C NMR (100 MHz, CDCl<sub>3</sub>): δ (ppm) 15.9, 23.9, 32.6, 123.5, 126.2, 128.3, 129.8, 135.6, 138.4, 146.7, 153.6, 206.3. ESI-MS: *m/z* 200 [M+H]<sup>+</sup>. Anal. Calcd. for C<sub>13</sub>H<sub>13</sub>NO: C, 78.36; H, 6.58; N, 7.03%; Found: C, 78.42; H, 6.39; N, 7.11%.

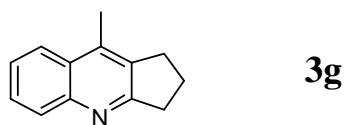

**9-Methyl-2,3-dihydro-1H-cyclopenta[b]quinoline (3g)<sup>1</sup>**

Solid; Yield: 0.161 g, 88%; m.p. 58-60 °C; <sup>1</sup>H NMR (400 MHz, CDCl<sub>3</sub>): δ (ppm) 2.18 (quint., 2H, ring CH<sub>2</sub>), 2.55 (s, 3H, CH<sub>3</sub>), 3.05 (t, *J* = 7.4 Hz, 2H, ring CH<sub>2</sub>), 3.15 (t, *J* = 7.7 Hz, 2H, ring CH<sub>2</sub>), 7.44-7.48 (m, 1H, Ar-H), 7.58-7.62 (m, 1H, Ar-H), 7.90-7.92 (m, 1H, Ar-H), 7.99-8.01 (m, 1H, Ar-H); <sup>13</sup>C NMR (100 MHz, CDCl<sub>3</sub>): δ (ppm) 14.7, 22.6, 29.8, 34.8, 123.1, 125.5, 126.9, 127.8, 128.9, 133.7, 137.8, 141.3, 147.5, 166.6. ESI-MS: *m/z* 184 [M+H]<sup>+</sup>. Anal. Calcd. for C<sub>13</sub>H<sub>13</sub>N: C, 85.21; H, 7.15; N, 7.64%; Found: C, 85.32; H, 7.06; N, 7.55%.

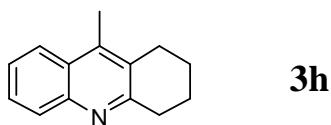

**9-Methyl-1,2,3,4-tetrahydroacridine (3h)<sup>2</sup>**

Solid; Yield: 0.167 g, 85%; m.p. 76-77 °C; <sup>1</sup>H NMR (400 MHz, CDCl<sub>3</sub>): δ (ppm) 1.93 (quint., 4H, ring CH<sub>2</sub>), 2.54 (s, 3H, CH<sub>3</sub>), 2.90 (t, *J* = 5.9 Hz, 2H, ring CH<sub>2</sub>), 3.11 (t, *J* = 6.4 Hz, 2H, ring CH<sub>2</sub>), 7.45-7.47 (m, 1H, Ar-H), 7.57-7.60 (m, 1H, Ar-H), 7.95-7.97 (m, 2H, Ar-H); <sup>13</sup>C NMR (100 MHz, CDCl<sub>3</sub>): δ (ppm) 13.6, 22.9, 23.3, 27.1, 34.6, 123.4, 125.3, 127.0, 128.1, 128.7, 129.1, 141.3, 146.0, 158.6. ESI-MS: *m/z* 198 [M+H]<sup>+</sup>. Anal. Calcd. for C<sub>14</sub>H<sub>15</sub>N: C, 85.24; H, 7.66; N, 7.10%; Found: C, 85.16; H, 7.76; N, 6.99%.

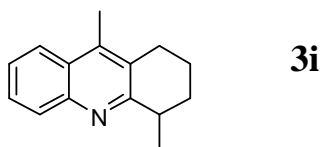

**4,9-Dimethyl-1,2,3,4-tetrahydroacridine (3i)**

Solid; Yield: 0.179 g, 85%; m.p. 82-83 °C; <sup>1</sup>H NMR (400 MHz, CDCl<sub>3</sub>): δ (ppm) 1.47 (d, *J* = 6.2 Hz, 3H, CH<sub>3</sub>), 1.91 (quint., 2H, ring CH<sub>2</sub>), 2.07 (q, *J* = 6.4 Hz, 2H, ring CH<sub>2</sub>), 2.56 (s, 3H, CH<sub>3</sub>), 2.90 (t, *J* = 6.2 Hz, 2H, ring CH<sub>2</sub>), 3.13 (sext., *J* = 6.4 Hz, 1H, ring CH), 7.47-7.49 (m, 1H, Ar-H), 7.57-7.61 (m, 1H, Ar-H), 7.93-7.95 (m, 1H, Ar-H), 7.97-7.99 (m, 1H, Ar-H). <sup>13</sup>C NMR (100 MHz, CDCl<sub>3</sub>): δ (ppm) 13.6, 22.8, 23.1, 27.5, 34.6, 38.4, 123.4, 125.3, 127.2, 128.2, 128.9, 129.1, 141.1, 146.5, 155.8. ESI-MS: *m/z* 212 [M+H]<sup>+</sup>. Anal. Calcd. for C<sub>15</sub>H<sub>17</sub>N: C, 85.26; H, 8.11; N, 6.63%; Found: C, 85.19; H, 7.98; N, 6.56%.

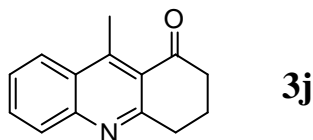

**9-Methyl-3,4-dihydroacridin-1(2H)-one (3j)<sup>3</sup>**

Solid; Yield: 0.184 g, 87%; m.p. 64-66 °C; <sup>1</sup>H NMR (400 MHz, CDCl<sub>3</sub>): δ (ppm) 1.87 (quint., 2H, ring CH<sub>2</sub>), 2.51 (s, 3H, CH<sub>3</sub>), 2.88 (t, *J* = 6.0 Hz, 2H, ring CH<sub>2</sub>), 3.12 (t, *J* = 6.4 Hz, 2H, ring CH<sub>2</sub>), 7.51-7.55 (m, 1H, Ar-H), 7.58-7.61 (m, 1H, Ar-H), 7.98-8.00 (m, 1H, Ar-H), 8.03-8.05 (m, 1H, Ar-H). <sup>13</sup>C NMR (100 MHz, CDCl<sub>3</sub>): δ (ppm) 15.6, 20.8, 34.2, 40.4, 124.4, 125.3, 127.2, 129.2, 130.9, 147.9, 149.2, 160.1, 199.6.

ESI-MS:  $m/z$  212  $[M+H]^+$ . Anal. Calcd. for  $C_{14}H_{13}NO$ : C, 79.59; H, 6.20; N, 6.63%; Found: C, 79.47; H, 6.33; N, 6.48%.

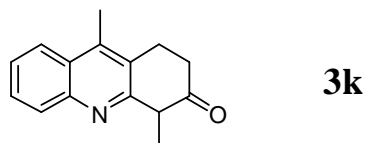

**4,9-Dimethyl-1,2-dihydroacridin-3(4H)-one (3k)**

Solid; Yield: 0.189 g, 84%; m.p. 66-67 °C;  $^1H$  NMR (400 MHz,  $CDCl_3$ ):  $\delta$  (ppm) 1.97 (d,  $J = 6.0$  Hz, 3H,  $CH_3$ ), 2.52 (s, 3H,  $CH_3$ ), 2.84 (t,  $J = 6.0$  Hz, 2H, ring  $CH_2$ ), 3.09 (t,  $J = 6.2$  Hz, 2H, ring  $CH_2$ ), 3.53 (q,  $J = 6.8$  Hz, 1H, ring CH), 7.50-7.54 (m, 1H, Ar-H), 7.59-7.63 (m, 1H, Ar-H), 7.95-7.97 (m, 1H, Ar-H), 7.99-8.01 (m, 1H, Ar-H).  $^{13}C$  NMR (100 MHz,  $CDCl_3$ ):  $\delta$  (ppm) 15.5, 20.8, 23.1, 38.7, 43.4, 123.4, 125.2, 127.6, 129.3, 131.5, 143.2, 149.4, 160.9, 201.2. ESI-MS:  $m/z$  226  $[M+H]^+$ . Anal. Calcd. for  $C_{15}H_{15}NO$ : C, 79.97; H, 6.71; N, 6.22%; Found: C, 79.78; H, 6.86; N, 6.11%.

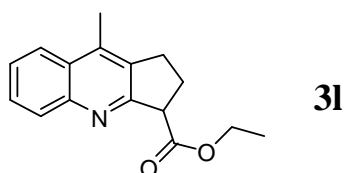

**Ethyl 9-methyl-2,3-dihydro-1H-cyclopenta[b]quinoline-3-carboxylate (3l)**

Viscous oil; Yield: 0.229 g, 90%;  $^1H$  NMR (400 MHz,  $CDCl_3$ ):  $\delta$  (ppm) 1.43 (t,  $J = 7.2$  Hz, 3H,  $CH_3$ ), 2.23 (q,  $J = 7.4$  Hz, 2H, ring  $CH_2$ ), 2.55 (s, 3H,  $CH_3$ ), 3.11 (t,  $J = 7.4$  Hz, 2H, ring  $CH_2$ ), 3.35 (t,  $J = 7.6$  Hz, 1H, ring CH), 4.47 (q,  $J = 7.2$  Hz, 2H,  $OCH_2$ ), 7.45-7.49 (m, 1H, Ar-H), 7.60-7.64 (m, 1H, Ar-H), 7.93-7.95 (m, 1H, Ar-H), 8.00-8.02 (m, 1H, Ar-H).  $^{13}C$  NMR (100 MHz,  $CDCl_3$ ):  $\delta$  (ppm) 14.3, 15.7, 24.4, 29.8, 54.8, 61.2, 123.3, 125.5, 126.0, 127.8, 129.1, 141.5, 146.1, 156.2, 168.7. ESI-MS:  $m/z$  256  $[M+H]^+$ . Anal. Calcd. for  $C_{16}H_{17}NO_2$ : C, 75.27; H, 6.71; N, 5.49%; Found: C, 75.34; H, 6.83; N, 5.31%.

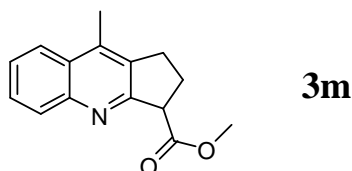

**Methyl 9-methyl-2,3-dihydro-1H-cyclopenta[b]quinoline-3-carboxylate (3m)**

Viscous oil; Yield: 0.202 g, 84%;  $^1H$  NMR (400 MHz,  $CDCl_3$ ):  $\delta$  (ppm) 2.29 (q,  $J = 7.4$  Hz, 2H, ring  $CH_2$ ), 2.59 (s, 3H,  $CH_3$ ), 2.89 (s, 3H,  $CH_3$ ), 3.19 (t,  $J = 7.4$  Hz, 2H, ring  $CH_2$ ), 3.35 (t,  $J = 7.6$  Hz, 1H, ring CH), 7.46-7.50 (m, 1H, Ar-H), 7.60-7.64 (m, 1H, Ar-H), 7.95-7.97 (m, 1H, Ar-H), 8.01-8.03 (m, 1H, Ar-H).  $^{13}C$  NMR (100 MHz,

CDCl<sub>3</sub>):  $\delta$  (ppm) 15.7, 24.2, 29.3, 53.8, 123.5, 125.8, 126.1, 127.8, 129.5, 141.3, 146.4, 156.2, 168.6. ESI-MS:  $m/z$  242 [M+H]<sup>+</sup>. Anal. Calcd. for C<sub>15</sub>H<sub>15</sub>NO<sub>2</sub>: C, 74.67; H, 6.27; N, 5.81%; Found: C, 74.56; H, 6.38; N, 5.72%.

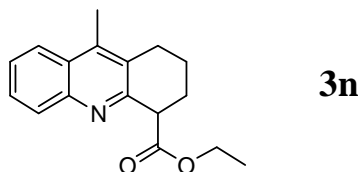

### Ethyl 9-methyl-1,2,3,4-tetrahydroacridine-4-carboxylate (**3n**)

Viscous oil; Yield: 0.210 g, 78%; <sup>1</sup>H NMR (400 MHz, CDCl<sub>3</sub>):  $\delta$  (ppm) 1.42 (t,  $J$  = 7.2 Hz, 3H, CH<sub>3</sub>), 1.89 (quint., 2H, ring CH<sub>2</sub>), 2.12 (q,  $J$  = 6.0 Hz, 2H, ring CH<sub>2</sub>), 2.56 (s, 3H, CH<sub>3</sub>), 3.07 (t,  $J$  = 6.4 Hz, 2H, ring CH<sub>2</sub>), 3.43 (t,  $J$  = 7.1 Hz, 1H, ring CH), 4.46 (q,  $J$  = 7.2 Hz, 2H, OCH<sub>2</sub>), 7.47-7.49 (m, 1H, Ar-H), 7.56-7.60 (m, 1H, Ar-H), 7.97-7.99 (m, 1H, Ar-H), 8.01-8.03 (m, 1H, Ar-H). <sup>13</sup>C NMR (100 MHz, CDCl<sub>3</sub>):  $\delta$  (ppm) 14.5, 15.9, 23.4, 28.8, 54.8, 61.6, 123.4, 125.5, 126.6, 127.3, 129.1, 141.5, 146.4, 157.7, 168.9. ESI-MS:  $m/z$  270 [M+H]<sup>+</sup>. Anal. Calcd. for C<sub>17</sub>H<sub>19</sub>NO<sub>2</sub>: C, 75.81; H, 7.11; N, 5.20%; Found: C, 75.89; H, 7.07; N, 5.32%.

### References

1. S. S. Palimkar, S. A. Siddiqui, T. Daniel, R. J. Lahoti and K. V. Srinivasan, *J. Org. Chem.*, 2003, **68**, 9371–9378.
2. L. Zhang and J. Wu, *Adv. Synth. Catal.*, 2007, **349**, 1047–1051.
3. C. S. Jia and G. W. Wang, *Lett. Org. Chem.*, 2006, **3**, 289–291.

### ESI-MS spectrum of Ethyl 2,4-dimethylquinoline-3-carboxylate (3a)

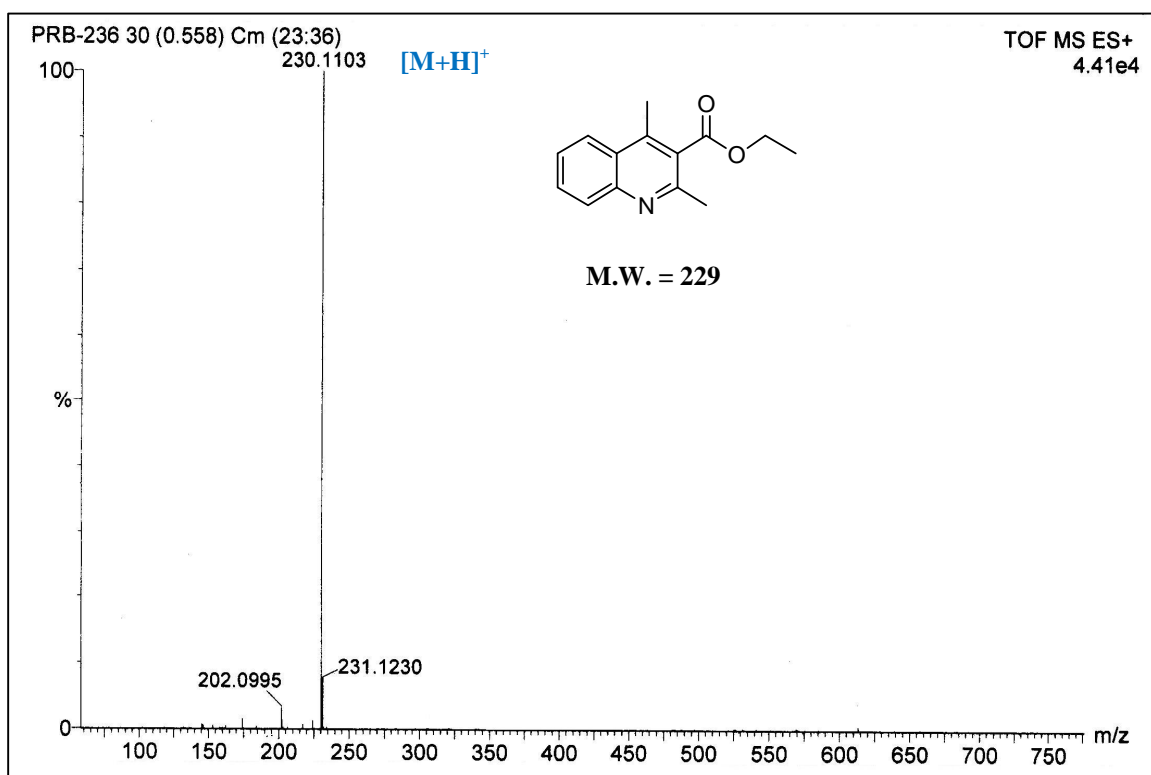

### ESI-MS spectrum of Isobutyl 2,4-dimethylquinoline-3-carboxylate (3c)

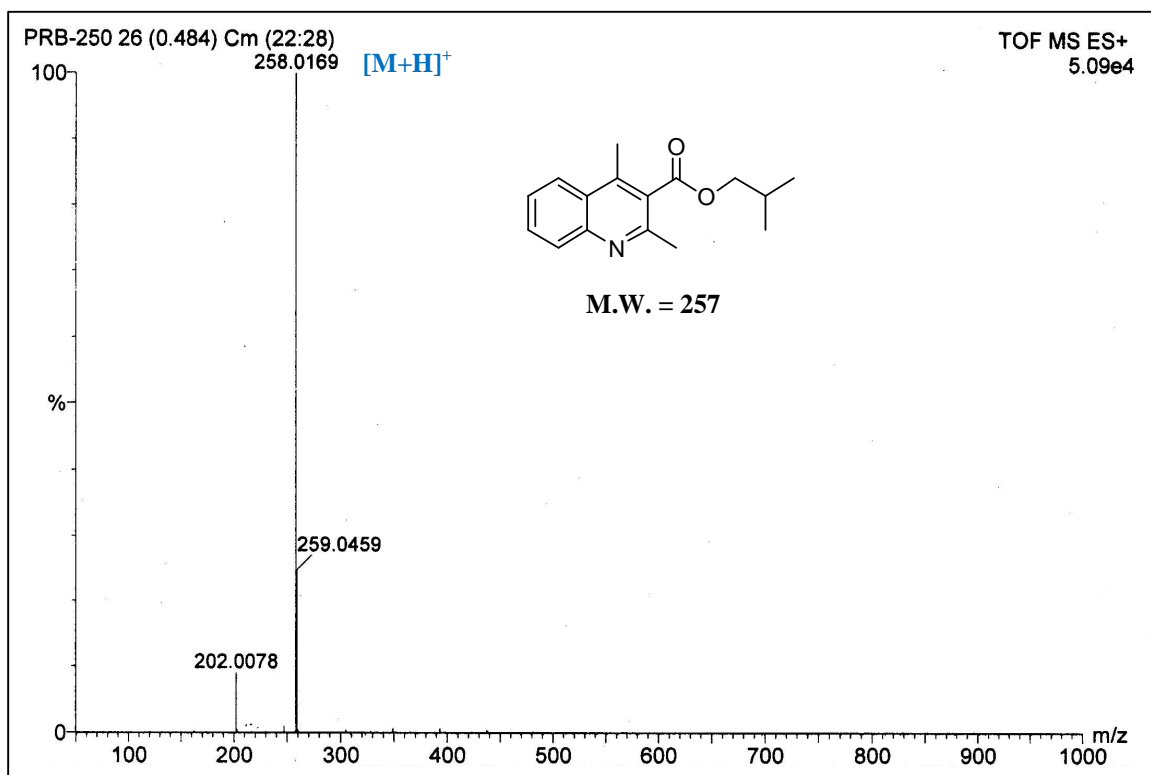



### ESI-MS spectrum of 9-Methyl-2,3-dihydro-1H-cyclopenta[b]quinoline (3g)

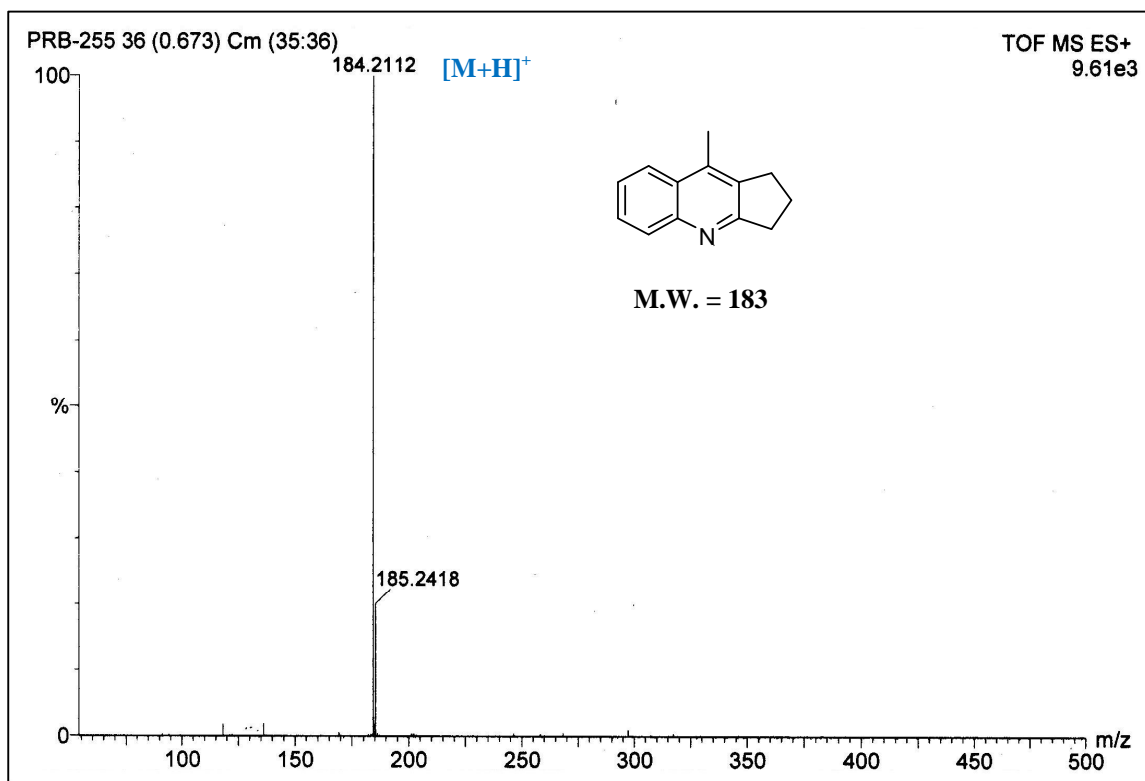

### ESI-MS spectrum of 4,9-Dimethyl-1,2,3,4-tetrahydroacridine (3i)

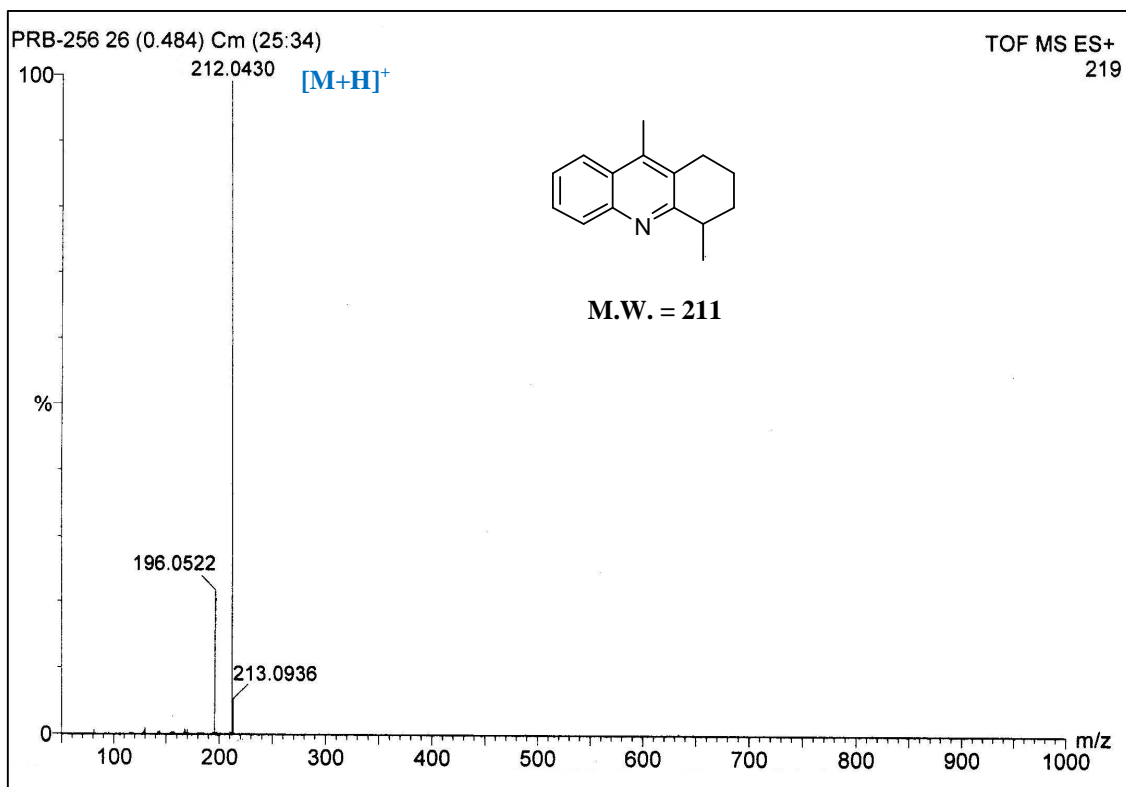

### ESI-MS spectrum of Ethyl 9-methyl-2,3-dihydro-1*H*-cyclopenta[*b*]quinoline-3-carboxylate (3l)

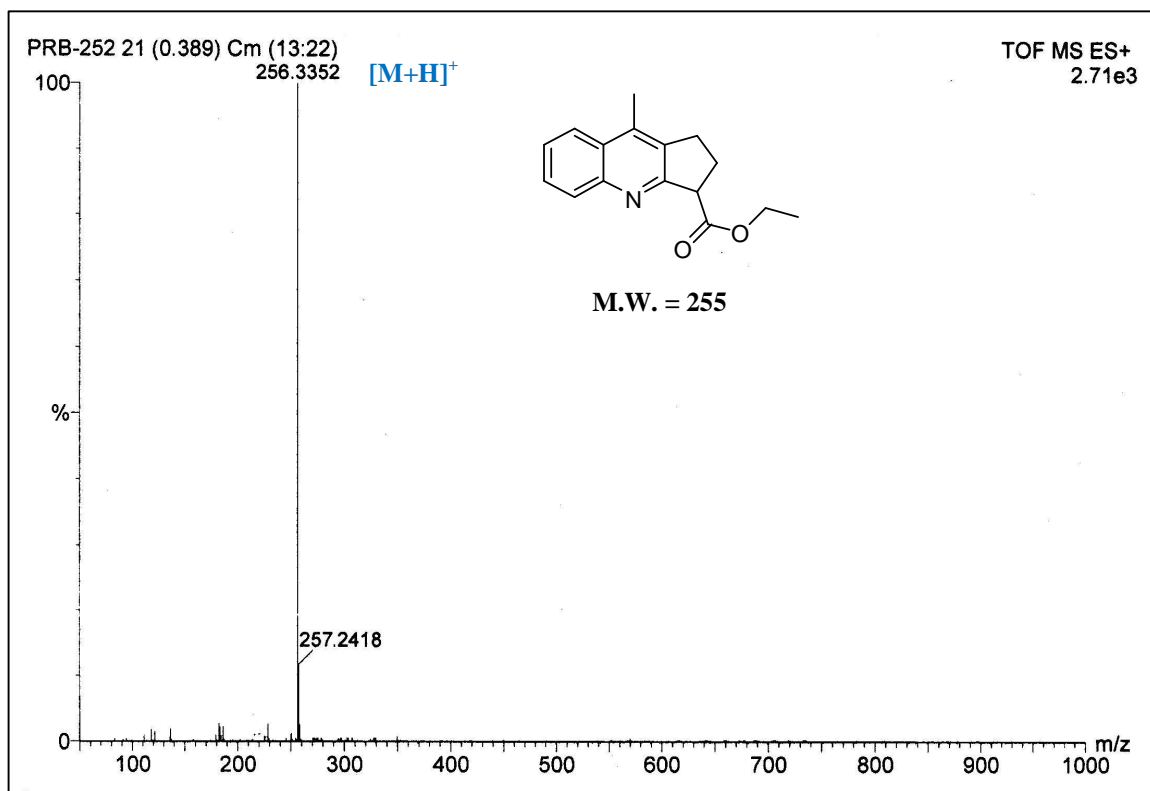

### ESI-MS spectrum of Ethyl 9-methyl-1,2,3,4-tetrahydroacridine-4-carboxylate (3n)

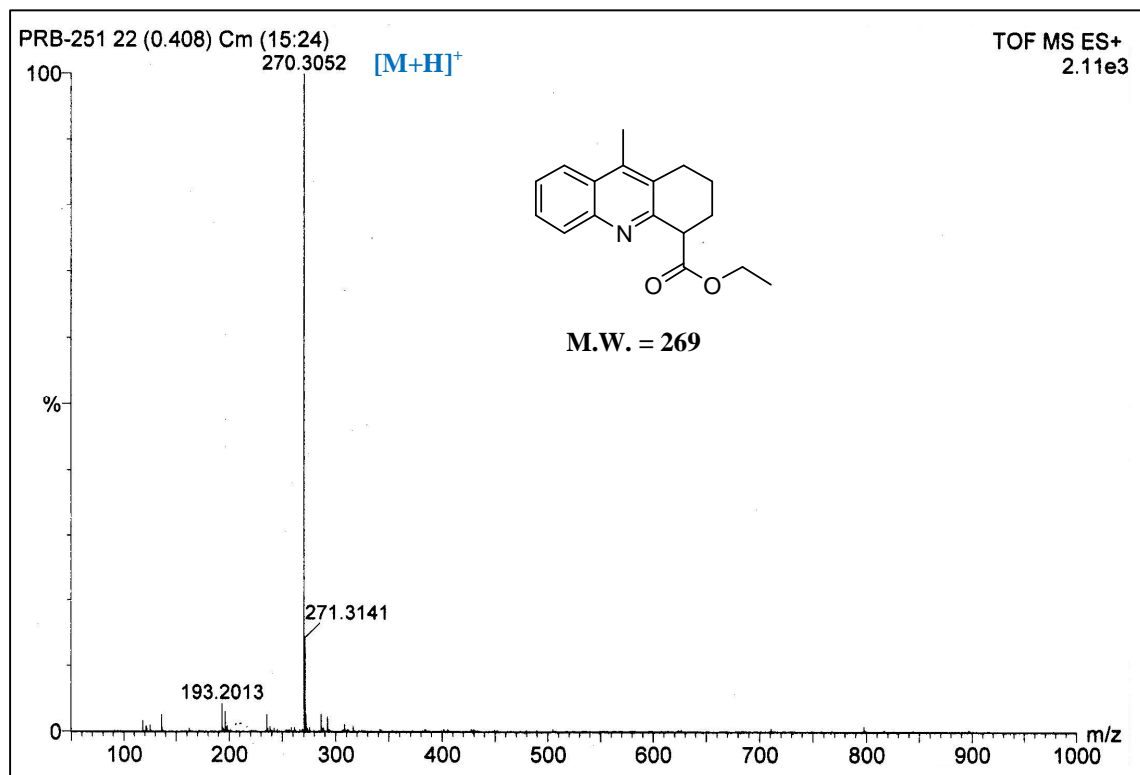

All the chromatograms were obtained under the same conditions and these results were obtained before the reaction was optimized.

**Product (3a) formation monitored by GC-MS [TiO<sub>2</sub> nanoparticles (16 nm) as the catalyst]**

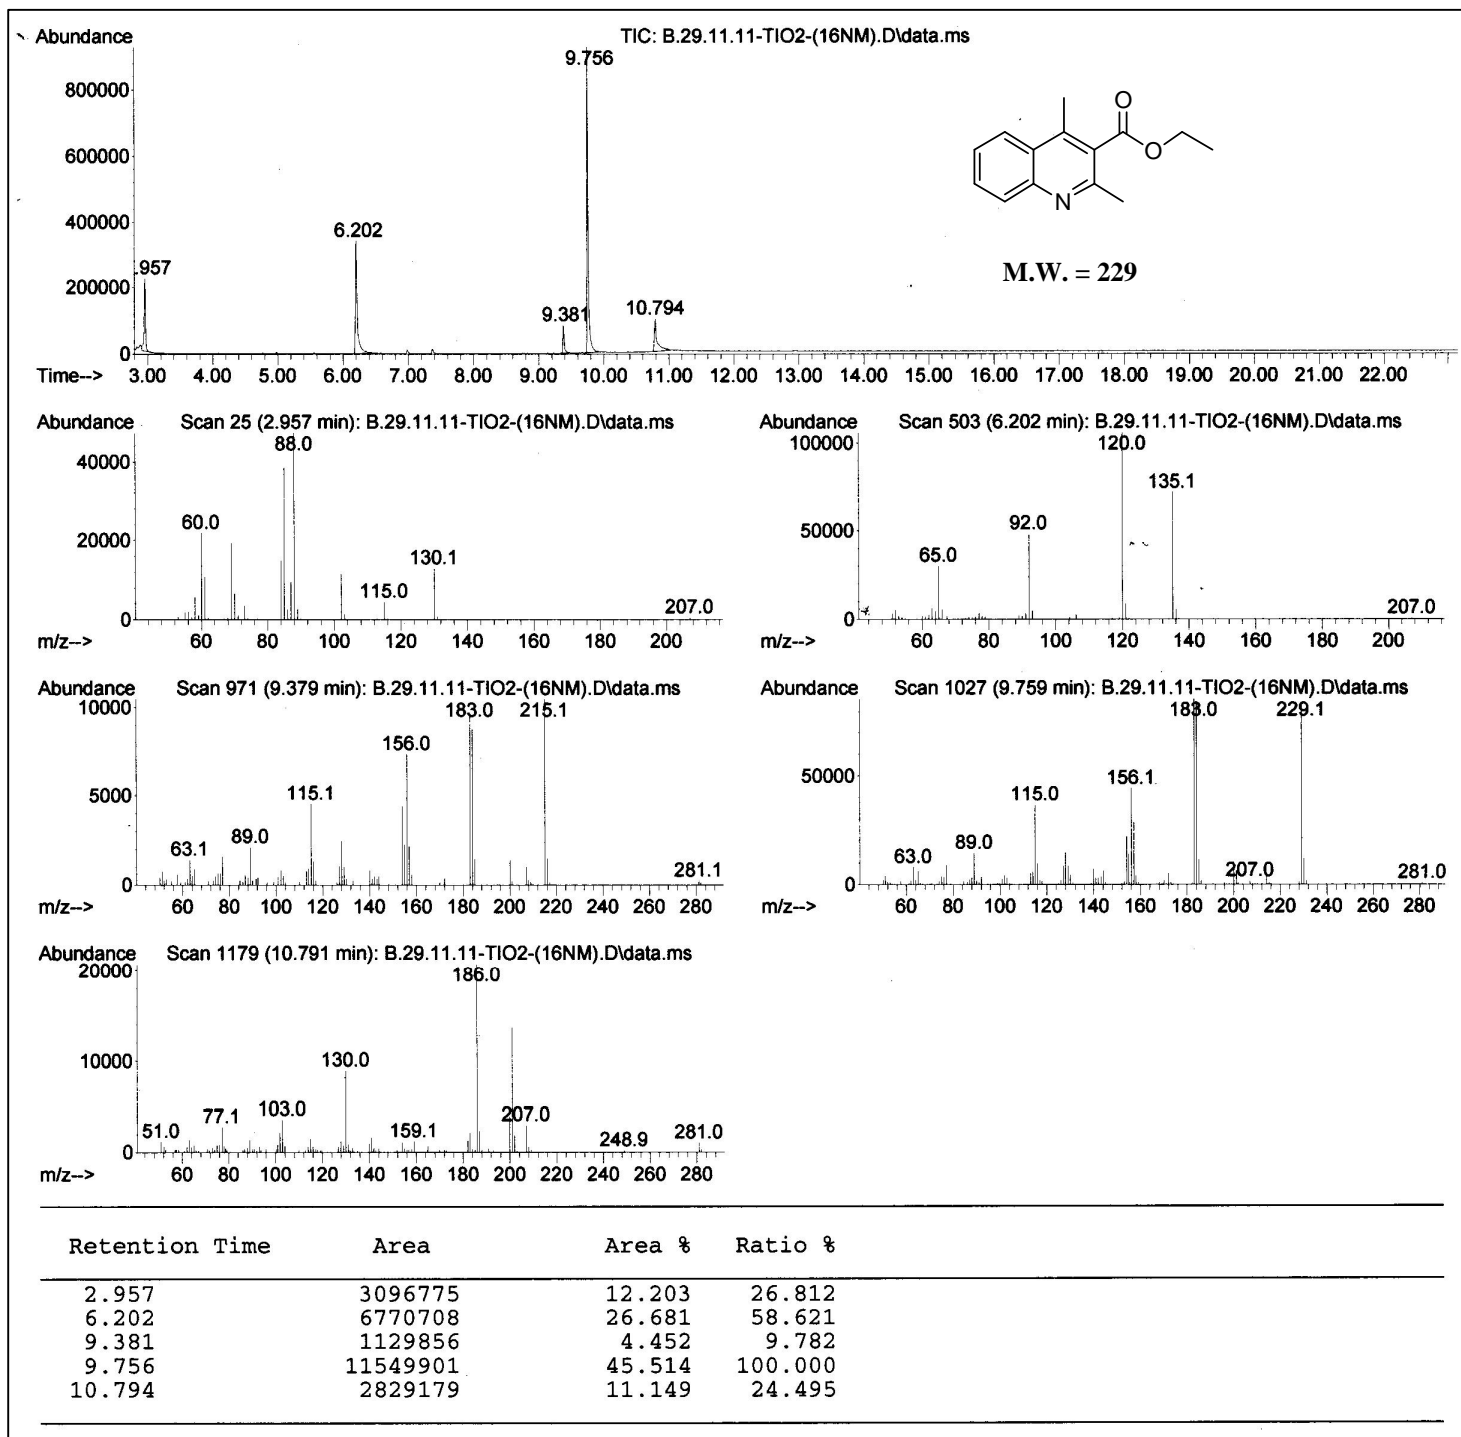

**Product (3a) formation monitored by GC-MS [TiO<sub>2</sub> nanoparticles (35 nm) as the catalyst]**

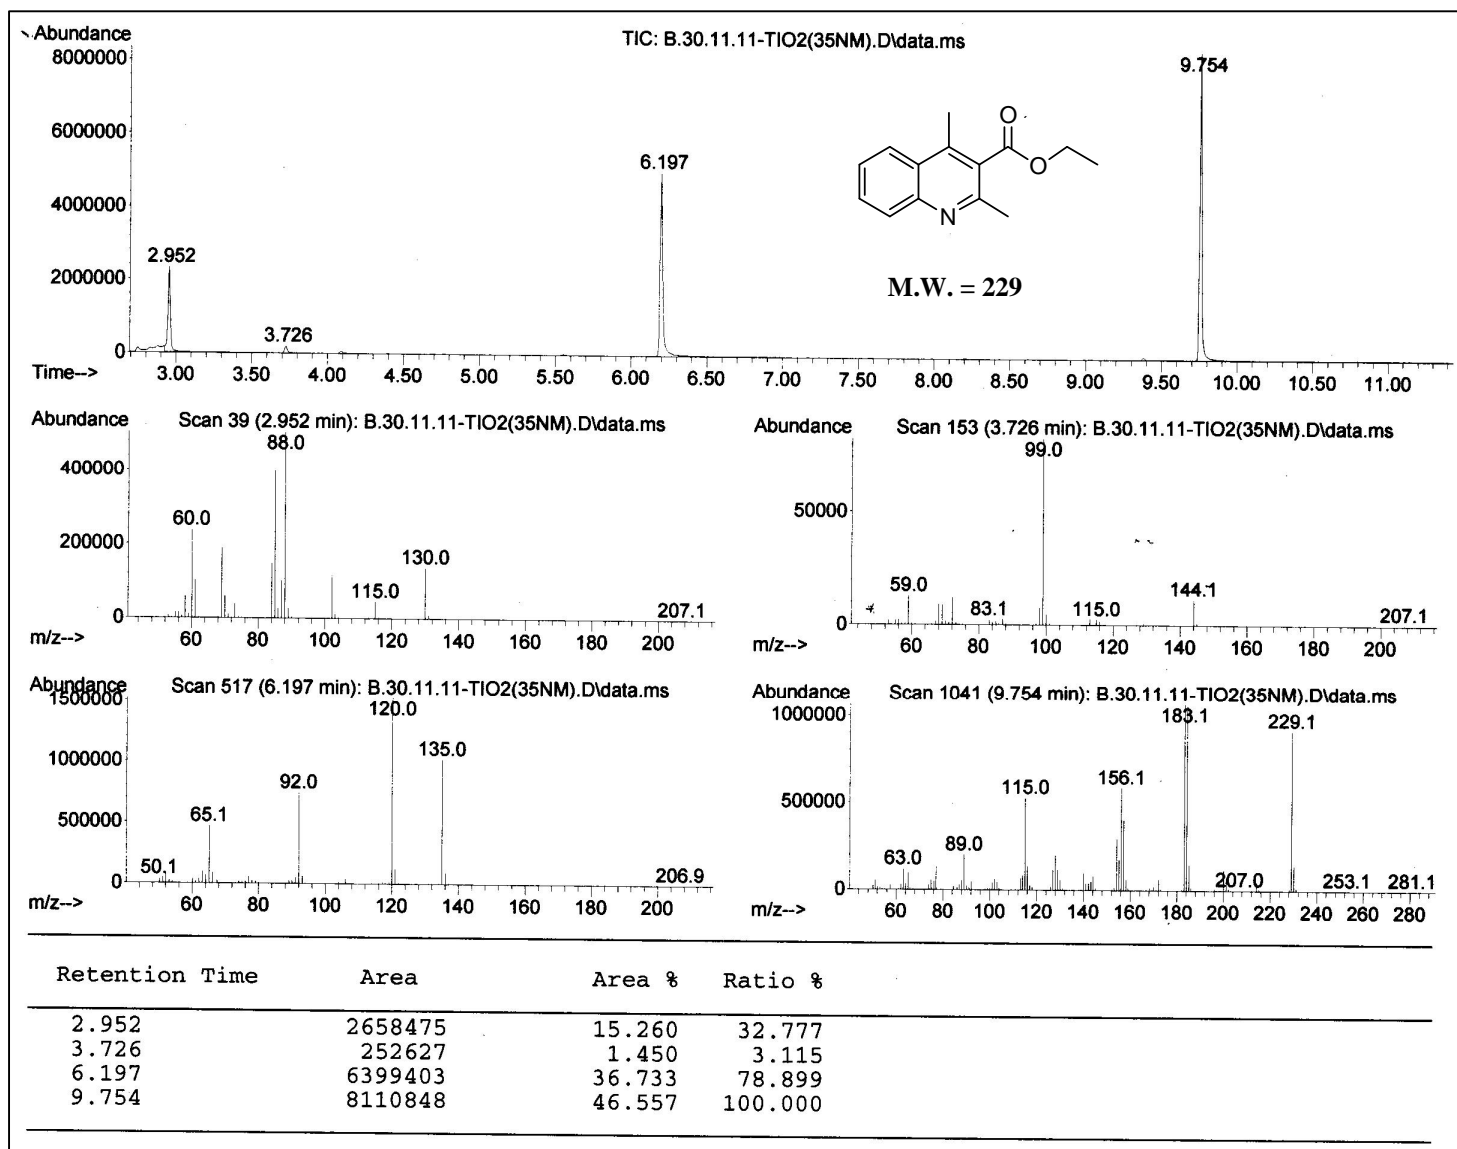

**Product (3a) formation monitored by GC-MS [TiO<sub>2</sub> nanoparticles (70 nm) as the catalyst]**

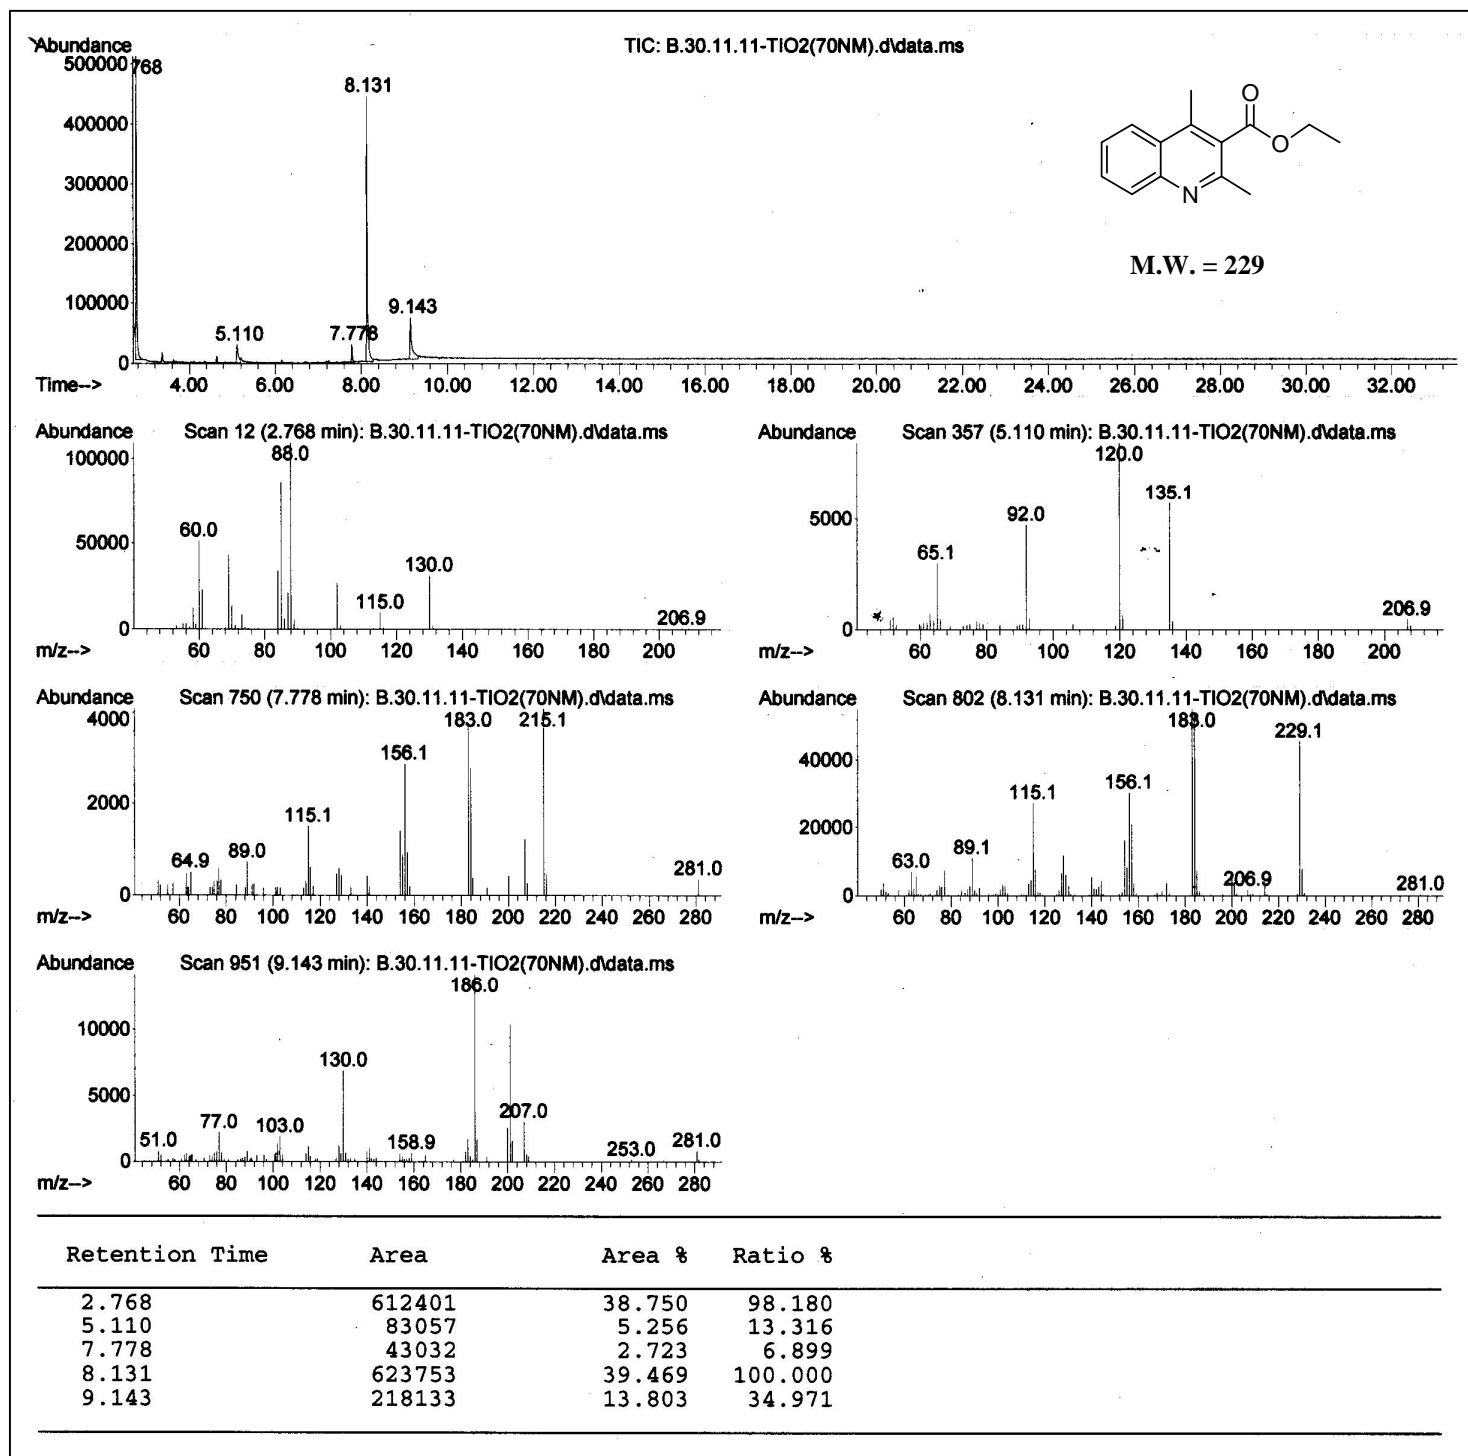

Supplement: c3ra46128a.pdf [file c3ra46128a.pdf]
